# Effect of Physical Activity on Olfactory Acuity: A Systematic Review

Mathieu Cournoyer<sup>1</sup>, Alexandre-Charles Gauthier<sup>1</sup>, Alice Maldera<sup>1</sup>, Fabien Dal Maso<sup>1,2</sup>, Marie-Eve Mathieu<sup>1,3,\*</sup>

1 École de Kinésiologie et des Sciences de l'Activité Physique de la Faculté de Médecine, Université de Montréal, 2100 Edouard Montpetit Blvd #8223, Montreal, QC H3T 1J4, Canada

2 Centre Interdisciplinaire de Recherche sur le Cerveau et l'Apprentissage, Montréal, QC, Canada

3 Centre de Recherche du CHU Sainte-Justine, 2100 Edouard Montpetit Blvd #8223, Montreal, QC H3T 1J4, Canada

\* Correspondence: [me.mathieu@umontreal.ca](mailto:me.mathieu@umontreal.ca); Tel.: +1-514-343-6737

## Abstract

Olfactory acuity, which includes detection thresholds, identification and appreciation/intensity, seems to decline with aging, obesity, and various neurological disorders. Knowing that the sense of smell influences energy intake, the interest in protecting this sense is constantly increasing. Physical activity might be a key intervention to counteract the loss of olfactory function. This systematic review aims to explore the literature on the effect of physical activity on olfactory acuity. The search strategy consisted of using index terms and keywords in MEDLINE, EMBASE, EBM Reviews – Cochrane Central Register of Controlled Trials, CINAHL, SPORTDiscus, and Web of Science search engine. Data from 17 studies that include 10 861 participants revealed that physical activity has improved olfactory thresholds, identification, and intensity. More precisely, chronic physical activity seemed to have better effects on olfactory components than acute practice. Even though this review clarified evidence about the effect of physical activity on the sense of smell, better methodological consistency is needed across studies such as standardized experimental conditions, the time of the day data are collected, and similar relative energy intake between participants to produce more robust results.

**Keywords:** exercise, olfaction, physical activity, chemosensory, aging, smell

## 1 Introduction

Olfactory acuity is the ability to discriminate the presence or the absence of an odor. This concept could be divided into three components: odor detection threshold, odor identification, and odor intensity. The odor detection threshold represents the lowest odor concentration that the participant can perceive. Odor identification highlights the participant's ability to discriminate the type of odor. Finally, odor intensity represents the degree of potency or vigor perceived by a participant to a certain type of odor. Also, odor intensity is usually inversely proportional to odor appreciation since a high odor intensity might feel uncomfortable while breathing. This main concept, with its three components, is often correlated with odor concentration. Indeed, the higher the concentration, the easier it should be to detect and identify the odor, and the higher the intensity.

Unfortunately, olfactory acuity seems to decrease in several situations, such as in aging, Parkinson's and Alzheimer's diseases, and people living with obesity [1-9]. This deterioration of the sense of smell can affect diet differently in each person. For example, there may be a decrease in the feeling of hunger, a lower quality energy intake, or even a lower protein consumption which could increase the loss of autonomy [10, 11]. In addition, there are also relations between loss of smell and social isolation [11-13], reduced cognitive functions [11, 14-18], fragile mental health [11, 19], and nutritional problems [10, 11]. Adequate energy intake is crucial to execute daily tasks with full autonomy or to perform a more intense activity, such as sports or other forms of exercise [11, 20]. Also, food consumption is directly connected to environmental stimuli such as the appearance of the food, its smell and the social context [21]. Correspondingly, olfactory sensitivity could affect energy balance by influencing energy intake. A study by Ginieis, Abeywickrema [22] suggested that a decreased olfactory sensitivity would lead to greater snack consumption between meals. Considering that many snacks consumed are energetically dense [23], it is possible to observe the simultaneous increase between the number of obesity cases and the growing habit of consuming snacks daily [24, 25]. Consequently, the sense of smell is an essential component of the quality of life, and that is why it needs to be preserved.

Interestingly, physical activity (PA) seems to protect against the deterioration of the sense of smell. Indeed, treating the loss of olfactory acuity in Parkinson's patients using PA might offer the same benefit as pharmacologic therapies, and this type of intervention showed to improve not only the olfactory function, but also motor symptoms [26, 27]. It is also possible to look into the physiological process of the olfactory loss to better understand the PA's impact. A study comparing patients with type 2 diabetes to healthy adults found that high blood pressure could decrease olfactory acuity for both groups [28]. Also, a Schiffman [9] study investigating olfactory loss documented some physiological changes that occurred with aging such as the loss of cells and neurotransmitters in the hippocampus and the olfactory bulb in the brain. These changes could explain olfactory loss and could be positively modified by PA. Erickson, Voss [29] showed that chronic PA reduced the effect of normal aging of hippocampus volume. Knowing that this cerebral structure is involved in the olfactory function, there could be a link between PA and olfactory acuity.

A deeper understanding of the effects of PA on olfactory acuity would be beneficial to highlight the mechanisms modulating energy intake. This systematic review, therefore, aims to highlight the scientific consensus on the influence of PA on olfactory acuity. We will explore the effect of different types of PA on the three component of olfactory acuity, namely, odor detection thresholds, odor identification and odor intensity.

## 2 Methods

### 2.1 Search Strategy

This systematic review followed the “Preferred Reporting Items for Systematic Reviews and Meta-Analysis” (PRISMA) guidelines. Six databases were used to perform the search: Medline (1946-present), Embase (1974-present), EBM Reviews – Cochrane Central Register of Controlled Trials (1991-present), CINAHL Plus with Full Text (1937-present), SportDiscus with Full Text (1930-present) and Web of Science (1945-present). The last

research was performed on December 22, 2021. The following keywords were used to search the concept of physical activity: "aerobic training" OR exercise\* OR "physical activity" OR "physical training" OR "resistance training" OR sport\* OR "strength training" OR "weight training" OR weightlifting OR "weight lifting" OR running OR football OR hockey OR athletes OR exertion OR "athletic performance". For olfaction, the following keywords were used: odor OR odour OR aroma OR fragrance\* OR smelling OR smell OR olfactory OR olfaction OR normosmic OR normosmia OR hyposmic OR hyposmia OR anosmic OR anosmia OR odorant\* OR sniff OR sniffing.

Included studies had to meet the following inclusion criteria: (1) investigate the effect of PA on olfactory acuity; (2) involving humans, both adults and children. On the other hand, studies were not included if (1) olfactory acuity had changed following head trauma or surgery; (2) studies were not completed or accepted in peer-review journals; (3) studies were written in a language other than English or French.

## 2.2 Study Selection

Figure 1 shows the evolution of the number of articles retained and excluded at each stage. Duplicates were removed after studies identification. The first screening of articles was done only using titles by two authors (MC, AD). The second screening of articles was done using abstracts by two authors (MC, AD). Subsequently, a final sorting was done by two authors (MC, AD) using the full texts of the remaining studies. All authors' conflicts were discussed internally and resolved by a third author (ACG).

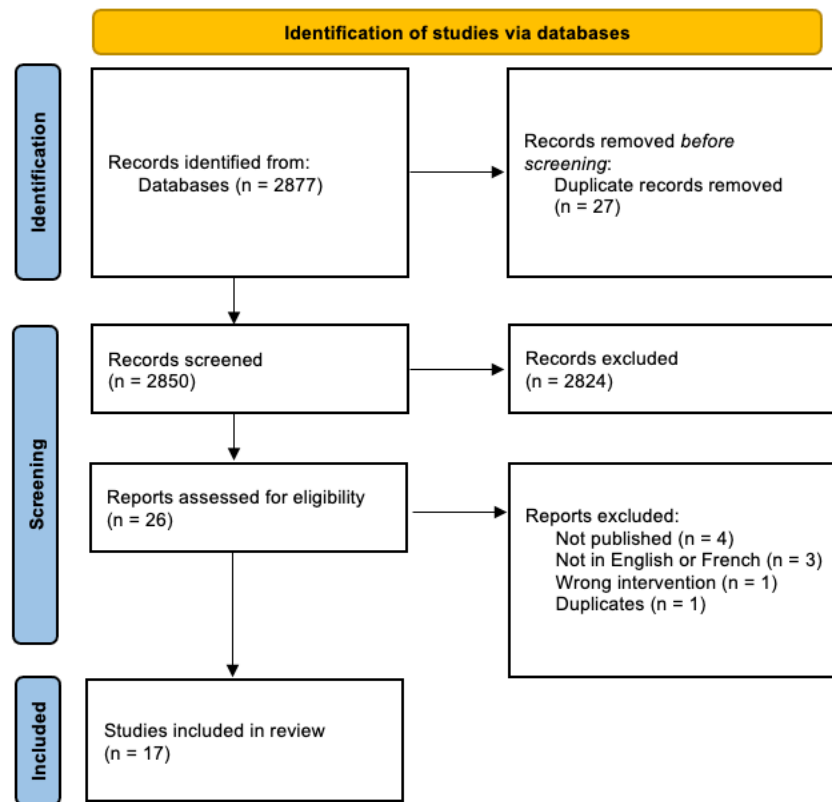

Figure 1. Flowchart of studies selection from their identification to final inclusion

### 2.3 Data Extraction and Analyses

Articles included following the selection process were read and analyzed by two authors (MC, AD). The data were processed by MC, extracted by MC and validated independently by AD. If differences were present, the authors reached a consensus following a discussion. If necessary, a third author (ACG) was consulted to make the decision. Data from included studies are summarized in Table 1, and their protocols are summarized in Table 2.

### 2.4 Risks of Bias and Quality Assessment

Risks of bias and quality assessment were analysed using the QUADAS-2 tool [30]. This tool consists of four key domains, which cover 1) patient selection, 2) index tests, 3) reference standards, and 4) flow of patients through the study and timing of the index test(s) and reference standard (“flow and timing”) [30]. All domains were assessed in terms of their risk of bias. Patient selection, index tests, and reference standards were also assessed in terms of concerns regarding applicability. The risk of bias was assessed by one author (ACG), and a consensus was reached through discussion with two authors (MC and AM).

## 3 Results

### 3.1 Study Selection

Two thousand eight hundred seventy-seven studies were screened based on their titles, of which 26 were kept for full-text studies assessment. Of those studies, 17 were analyzed, and data were extracted. As presented in Table 1, the latter had between 6 and 4926 participants, which gives a total of  $n = 10\ 861$  participants. There were also 14 of the 17 selected studies with an experimental design [31-44], including non-randomized studies [41-44]. The three remaining studies had a cross-sectional [45, 46] or a longitudinal [47] design. All 17 studies assessed the effect of PA on odor detection thresholds, odor identification, and/or odor appreciation/intensity for different type of odors.

### 3.2 Study and Physical Activity Intervention Characteristics

As presented in Table 1, studies took place in Canada [40, 44], China [41], Italy [34, 36, 42], Japan [32], the Netherlands [39], Poland [43], and the United States of America [31, 33, 35, 37, 38, 45-47]. The majority were conducted on healthy participants [33, 34, 36-42, 44-47] or participants living with a disease (e.g., Parkinson’s Disease)[31, 32, 35, 43]. Each study had an intervention time ranging from one session [32, 34, 37, 41, 43] to a 26-week program [31]. There was also one study with a 21-year follow-up [45]. Some exercise interventions consisted of cycling on an ergometer or running on a treadmill, and the intensity of the exercise was often based on the participant’s maximal oxygen consumption [31, 33, 35, 36, 38, 40, 44]. Other exercise interventions were the amount of daily movement that was associated to olfactory function [32], and an ultramarathon race (e.g., Tor des géants) [42]. Finally, the remaining studies assessed PA levels with a questionnaire (e.g. International Physical Activity Questionnaire [43]), and therefore included various types of PA [34, 37, 41, 43, 45-47].

### 3.3 Olfactory Protocols and Tests

As presented in Tables 1 and 2, 13 out of the 17 studies used sniffin’ sticks or odor pens with different odors [31, 32, 34-37, 40-44, 46, 47]. Two studies presented the odors in jars

[38, 39]. The two remaining studies used a flow olfactometer [33, 45]. Olfactory tests included 8 to 40 odors. The odor detection threshold tests mainly included unfamiliar odors such as n-butanol and heptanol. Participants usually had two or three sticks presented to them, and they had to identify the one with the odor. The studies with a flow olfactometer [33, 45] had a different protocol in which participants were asked if they detected the odor or not. For the odor identification tests, most of the odors presented were familiar ones (e.g., strawberries, smoke). Participants had to identify the odor inhaled between various odors shown on a list. Finally, two studies investigated the appreciation/intensity of odors [38, 44] with visual analogue scales. Participants had to rate those variables following an odor exposure.

Table 1. Included studies' characteristics

| Author                    | Country       | Study design                      | N   | Age                                                                  | Population description                                                                                                                                                                                                        | Intervention details                                                                                                                                                                                                                                                                                                                                                                                                                                              | Type of olfactory measure | Type of exercise measure | Main results                                                                                                                                                                                                                                                                                                    |
|---------------------------|---------------|-----------------------------------|-----|----------------------------------------------------------------------|-------------------------------------------------------------------------------------------------------------------------------------------------------------------------------------------------------------------------------|-------------------------------------------------------------------------------------------------------------------------------------------------------------------------------------------------------------------------------------------------------------------------------------------------------------------------------------------------------------------------------------------------------------------------------------------------------------------|---------------------------|--------------------------|-----------------------------------------------------------------------------------------------------------------------------------------------------------------------------------------------------------------------------------------------------------------------------------------------------------------|
| Bhalla et al., 2018 [31]  | United States | Experimental                      | 18  | Control group: 79<br>Exercise group: 75                              | Sedentary participants with diagnosed Alzheimer                                                                                                                                                                               | Participants were randomly divided into two groups: the exercise group and the control group. They respectively made aerobic exercise or stretching exercises for 40 minutes, three days per week, for a total of 26 weeks. Participants also had to complete olfactory and cognition tests before and after the 26-week program.                                                                                                                                 | UPSIT score               |                          | No significant difference within the control group and the exercise group for the pre-UPSIT test and the post-test. Also, no significant differences between each group for the UPSIT test.                                                                                                                     |
| Zhang et al., 2020 [41]   | China         | Non-randomized experimental study | 99  | Exercise group: 62,5<br>Control group: 62,4                          | Participants older than 50 years who are healthy                                                                                                                                                                              | Same conditions for all subjects: Participants were assigned to two groups according to their PA level. Each participant had to complete a questionnaire about their personal information (e.g. PA level, smoking, drinking, ...). Then they did a cognitive test (mini-mental state examination), completing a 30-question questionnaire. Finally, participants completed an odor identification test and an odor threshold test.                                | Sniffin' Sticks           | Questionnaire            | Significant better results for both olfaction tests in the exercise group compared to the control group. Significant results for the type of PA and the olfaction tests. Indeed, participants who did Taiji, dancing or running had better results on those tests than participants who did walking or nothing. |
| Tonacci et al., 2016 [42] | Italy         | Non-randomized experimental study | 149 | Athletes: 44,4<br>Control athletes: 44,1<br>Sedentary controls: 43,1 | Athletes group: subjects were participants of the Tor des Géants (332,5 km) and had no olfactory dysfunction.<br>Control athletes' group: Athletes that did not perform ultramarathons.<br>Sedentary group: sedentary persons | Same conditions for all subjects: They did a health evaluation with questions about health (hypertension, cholesterol, diabetes, smoking, PA quantity). Then, they did an olfactory evaluation with Sniffin' Sticks. They were tested before the race, after the first half and during the last hour before the finish line. Moreover, their weight, body mass and body water were also measured. Their sleeping time was measured with a Fitbit during the race. | Sniffin' sticks           | Race: Tor des Géants     | Athletes had a decrease in olfactory function during the Tor des Géants, meaning they had better scores at the beginning than at the end of the race. No significant differences exist between the scores at the start and the middle or at the middle and end. No difference between males and females.        |

|                           |       |              |    |      |                                                                                          |                                                                                                                                                                                                                                                                                                                                                                                                                                                                                                                                                                                                                                                                                                                                                                                                                             |                                             |                                                                        |                                                                                            |
|---------------------------|-------|--------------|----|------|------------------------------------------------------------------------------------------|-----------------------------------------------------------------------------------------------------------------------------------------------------------------------------------------------------------------------------------------------------------------------------------------------------------------------------------------------------------------------------------------------------------------------------------------------------------------------------------------------------------------------------------------------------------------------------------------------------------------------------------------------------------------------------------------------------------------------------------------------------------------------------------------------------------------------------|---------------------------------------------|------------------------------------------------------------------------|--------------------------------------------------------------------------------------------|
| Terashi et al., 2019 [32] | Japan | Experimental | 52 | 65,9 | Outpatient Clinic's patients with early-stage Parkinson's disease and with no treatment. | <p>Same conditions for all subjects: Each participant had a MIMAMORI-Gait device to measure the trunk and limb movements for 24 hours. Also, each participant did the mini-mental state examination test with a neuropsychologist: clock drawing test; the frontal assessment battery with six sub-tests; the Behavioral Assessment of the Dysexecutive Syndrome with six sub-tests. The final score was on 100.</p> <p>Psychiatric, depression and apathy symptoms were evaluated with the Beck depression Inventory-Second Edition and the Starkstein Apathy Scale. Then, the olfactory function was evaluated with the odor Stick Test for Japanese. Subjects had to identify 12 different familiar odors. Finally, motor symptoms were evaluated with the Unified Parkinson's disease rating scale part III scores.</p> | Odor stick identification test for Japanese | Trunk and limb movements with the MIMAMORI-Gait device (accelerometer) | There is no significant association between olfactory dysfunction and physical activities. |
|---------------------------|-------|--------------|----|------|------------------------------------------------------------------------------------------|-----------------------------------------------------------------------------------------------------------------------------------------------------------------------------------------------------------------------------------------------------------------------------------------------------------------------------------------------------------------------------------------------------------------------------------------------------------------------------------------------------------------------------------------------------------------------------------------------------------------------------------------------------------------------------------------------------------------------------------------------------------------------------------------------------------------------------|---------------------------------------------|------------------------------------------------------------------------|--------------------------------------------------------------------------------------------|

|                         |               |              |         |         |                                                             |                                                                                                                                                                                                                                                                                                                                                                                                                                                                                                                                                                                                                                                                                                                                                                                                                                                                                                                                                                                                       |              |                                    |                                                                                                                                                                                                                    |
|-------------------------|---------------|--------------|---------|---------|-------------------------------------------------------------|-------------------------------------------------------------------------------------------------------------------------------------------------------------------------------------------------------------------------------------------------------------------------------------------------------------------------------------------------------------------------------------------------------------------------------------------------------------------------------------------------------------------------------------------------------------------------------------------------------------------------------------------------------------------------------------------------------------------------------------------------------------------------------------------------------------------------------------------------------------------------------------------------------------------------------------------------------------------------------------------------------|--------------|------------------------------------|--------------------------------------------------------------------------------------------------------------------------------------------------------------------------------------------------------------------|
| Stone et al., 1967 [33] | United States | Experimental | 6 males | Unknown | Males from a group who did not have olfactory dysfunctions. | <p>Same conditions for all subjects: They were tested twice a day under two different conditions: rest and active. Each condition had to identify if they were smelling anything when the light turned on in two different procedures. For the rest condition, participants had to sit calmly. For the active condition, they had to cycle for one minute at 20 mph before and during the test. For the first procedure, there were five different odors to identify for a total of eight, with three non-odorant "blanks" in a forced choice method. They did the test four times for the resting condition and twice for the active one. For the second procedure, the subject also had to identify a smell in a forced choice method. Although, the difference was that there was no fixed series, meaning that the participant was tested until he could not smell anything. Just like the first procedure, there were some real and "blank" smells. The subject did 16 series for each odor.</p> | Olfactometer | Cycle ergometer with a speedometer | There was no difference between the two conditions (rest and active) in odor detection. Also, there were significant differences between odors. Finally, exercise had different results depending on the subjects. |
|-------------------------|---------------|--------------|---------|---------|-------------------------------------------------------------|-------------------------------------------------------------------------------------------------------------------------------------------------------------------------------------------------------------------------------------------------------------------------------------------------------------------------------------------------------------------------------------------------------------------------------------------------------------------------------------------------------------------------------------------------------------------------------------------------------------------------------------------------------------------------------------------------------------------------------------------------------------------------------------------------------------------------------------------------------------------------------------------------------------------------------------------------------------------------------------------------------|--------------|------------------------------------|--------------------------------------------------------------------------------------------------------------------------------------------------------------------------------------------------------------------|

|                            |               |                       |      |                                |                                                                   |                                                                                                                                                                                                                                                                                                                                                                                                                                                                                                                                      |                        |                                                     |                                                                                                                                                                                                                                      |
|----------------------------|---------------|-----------------------|------|--------------------------------|-------------------------------------------------------------------|--------------------------------------------------------------------------------------------------------------------------------------------------------------------------------------------------------------------------------------------------------------------------------------------------------------------------------------------------------------------------------------------------------------------------------------------------------------------------------------------------------------------------------------|------------------------|-----------------------------------------------------|--------------------------------------------------------------------------------------------------------------------------------------------------------------------------------------------------------------------------------------|
| Sollai et Crnjar, 2021[34] | Italy         | Experimental          | 122  | Group 1: 67,8<br>Group 2: 71,1 | Elderly from Cagliari and south Sardinia without health problems. | Subjects were divided into two groups: The first had the active subjects (active lifestyle: social, physical, and cognitive activity). The second had inactive subjects. Same conditions for all subjects: Participants did an interview with four questions about their physical, social, and cognitive activities during a day or a week. Then, their olfactory function was evaluated with "Sniffin' Sticks". They did three tests: olfactory threshold (T-test), odor discrimination (D-test), and odor identification (I-test). | Sniffin' Sticks        | Evaluation with questions about physical activities | Active subjects had higher olfactory scores (thresholds, identification and discrimination) than inactive subjects. Positive correlation for the active group between the total olfactory score and the number of hours of exercise. |
| Schubert et al., 2017 [45] | United States | Cross-sectional study | 832  | 77 (68-99)                     | Participants of the Epidemiology of Hearing Loss Study            | Same conditions for all subjects: Participants had to complete an ODT and an odor identification test. They also completed questionnaires and interviews (mini-mental state exam, health history, behavioral information).                                                                                                                                                                                                                                                                                                           | Automated olfactometer | Questionnaire                                       | Active participants (at least 1x/week) are less likely to have a low ODT score. No significant association between PA level and mean butanol concentration for detection.                                                            |
| Schubert et al., 2013 [47] | United States | Longitudinal study    | 4926 | 43-85                          | Residents of the Beaver Dam city                                  | Same conditions for all subjects: Participants had to complete the olfactory test every five years (for a total of 16 years), which was the SDOIT. The exercise data were collected with two questions during an interview. The other covariates were collected with the medical exam and an interview.                                                                                                                                                                                                                              | SDOIT                  | Two questions from an interview                     | Participants who exercised a minimum of 1x/a week had lower chances of developing an olfactory problem over ten years. This result was also more significant for those who exercise 3x/week or more.                                 |



|                              |               |              |    |                                     |                                                                       |                                                                                                                                                                                                                                                                                                                                                                                                                                                                                                                                                                                                                                                                                                                                                                                                                                                                                                                                                           |           |                                                                                                                                                                                                                                                                                                       |
|------------------------------|---------------|--------------|----|-------------------------------------|-----------------------------------------------------------------------|-----------------------------------------------------------------------------------------------------------------------------------------------------------------------------------------------------------------------------------------------------------------------------------------------------------------------------------------------------------------------------------------------------------------------------------------------------------------------------------------------------------------------------------------------------------------------------------------------------------------------------------------------------------------------------------------------------------------------------------------------------------------------------------------------------------------------------------------------------------------------------------------------------------------------------------------------------------|-----------|-------------------------------------------------------------------------------------------------------------------------------------------------------------------------------------------------------------------------------------------------------------------------------------------------------|
| Rosenfeldt et al., 2016 [35] | United States | Experimental | 38 | Nonexercise: 60,9<br>Exercise: 60,5 | Participants have been diagnosed with idiopathic Parkinson's disease. | Same conditions for all subjects: Participants stopped taking Parkinson's medications at eight p.m. the night before the odor tests. The odors test was performed before and after the treatment, and four weeks after the last exercise session. FE group: Participants took their Parkinson's medications during each exercise session. They made a 10-minute warm-up while cycling on a semi-recumbent bike, then a 40-minute exercise set, and finally a 10-minute cooldown. The participant himself selected the pace, although they were advised to target a heart rate between 60%-80% based on their heart rate reserve. Voluntary exercise group: Participants had the same protocol as the FE group, but with a semi-recumbent bike custom with a motor that helped the participants to produce more power. Nonexercise (CON) group: Participants did not practice exercise intervention and were told to continue their actual exercise level. | The UPSIT | A significant difference between exercise and non-exercise on the UPSIT scores from the baseline to the end of treatment and baseline to four weeks after the end of treatment. No significant results for the heart rate reserve, cadence and UPSIT scores between FE and voluntary exercise groups. |
|------------------------------|---------------|--------------|----|-------------------------------------|-----------------------------------------------------------------------|-----------------------------------------------------------------------------------------------------------------------------------------------------------------------------------------------------------------------------------------------------------------------------------------------------------------------------------------------------------------------------------------------------------------------------------------------------------------------------------------------------------------------------------------------------------------------------------------------------------------------------------------------------------------------------------------------------------------------------------------------------------------------------------------------------------------------------------------------------------------------------------------------------------------------------------------------------------|-----------|-------------------------------------------------------------------------------------------------------------------------------------------------------------------------------------------------------------------------------------------------------------------------------------------------------|

|                           |       |              |    |              |                                              |                                                                                                                                                                                                                                                                                                                                                                                                                                                                                                                                                           |                                                          |                                                                                                                                         |
|---------------------------|-------|--------------|----|--------------|----------------------------------------------|-----------------------------------------------------------------------------------------------------------------------------------------------------------------------------------------------------------------------------------------------------------------------------------------------------------------------------------------------------------------------------------------------------------------------------------------------------------------------------------------------------------------------------------------------------------|----------------------------------------------------------|-----------------------------------------------------------------------------------------------------------------------------------------|
| Marioni et al., 2010 [36] | Italy | Experimental | 15 | 26,2 (20-33) | Healthy Caucasians who are moderately active | Same conditions for all subjects: Two days before the evaluation sessions, participants had to eat a balanced diet, exercise vigorously, sleep well and not take coffee, drugs, or alcohol. Each session was in the afternoon, two hours after dinner. Participants had to complete a maximal incremental test on the treadmill for the first visit. For the second one, the PNIF and the olfactory thresholds were first measured. After this nasal test, participants completed the exercise test. Right after, participants did the nasal tests again. | Flow meter, Le Nez du Vin test, and Sniffin' Sticks test | A significantly higher PNIF after PA than before. No significant effect on the olfactory thresholds before and after the exercise test. |
|---------------------------|-------|--------------|----|--------------|----------------------------------------------|-----------------------------------------------------------------------------------------------------------------------------------------------------------------------------------------------------------------------------------------------------------------------------------------------------------------------------------------------------------------------------------------------------------------------------------------------------------------------------------------------------------------------------------------------------------|----------------------------------------------------------|-----------------------------------------------------------------------------------------------------------------------------------------|

|                            |        |                                   |    |            |                                             |                                                                                                                                                                                                                                                                                                                                                                                                                                                                                                                                                                                                                                                                                                                                                                                                                                                                                                                                                                                                                                                                                            |                         |                                                                                                                                                                         |
|----------------------------|--------|-----------------------------------|----|------------|---------------------------------------------|--------------------------------------------------------------------------------------------------------------------------------------------------------------------------------------------------------------------------------------------------------------------------------------------------------------------------------------------------------------------------------------------------------------------------------------------------------------------------------------------------------------------------------------------------------------------------------------------------------------------------------------------------------------------------------------------------------------------------------------------------------------------------------------------------------------------------------------------------------------------------------------------------------------------------------------------------------------------------------------------------------------------------------------------------------------------------------------------|-------------------------|-------------------------------------------------------------------------------------------------------------------------------------------------------------------------|
| Josaphat et al., 2020 [44] | Canada | Non-randomized experimental study | 12 | 25 (18-35) | Males with a normal weight and non-athletes | <p>Same conditions for all subjects: during the preliminary visit, participants underwent anthropometric measures, answered the Three-Factor Eating Questionnaire, did a gustative and olfactory perception test and a progressive treadmill test. They were also told not to exercise vigorously 24 hours before the experimental visits and to fast for 12 hours until their standardized breakfast. At the arrival of each participant, they needed to rate their appetite. Then they did the gustative and olfactory perception test (8:30). For the experimental visit called EX9:40, participants had to run on a treadmill for 30 minutes immediately after the sensory test and then take a 90-minute break. For the experimental visit called EX10:30, right after the first sensory test, participants took a 90-minute break and then the exercise right after. Participants were asked to complete the sensory test (11:40) again for both experimental visits, and an ad libitum buffet was served at the end. Each participant had to complete both experimental visits.</p> | Sniffin' Sticks and VAS | Significant time effects on food-related odors with increased intensity perception between the 8:30 and 11:30 tests. No significant effects for non-related food odors. |
|----------------------------|--------|-----------------------------------|----|------------|---------------------------------------------|--------------------------------------------------------------------------------------------------------------------------------------------------------------------------------------------------------------------------------------------------------------------------------------------------------------------------------------------------------------------------------------------------------------------------------------------------------------------------------------------------------------------------------------------------------------------------------------------------------------------------------------------------------------------------------------------------------------------------------------------------------------------------------------------------------------------------------------------------------------------------------------------------------------------------------------------------------------------------------------------------------------------------------------------------------------------------------------------|-------------------------|-------------------------------------------------------------------------------------------------------------------------------------------------------------------------|

|                           |               |              |      |     |                                                      |                                                                                                                                                                                                                                                                                                                                                                                                                                                                      |                                 |                                                                                           |                                          |
|---------------------------|---------------|--------------|------|-----|------------------------------------------------------|----------------------------------------------------------------------------------------------------------------------------------------------------------------------------------------------------------------------------------------------------------------------------------------------------------------------------------------------------------------------------------------------------------------------------------------------------------------------|---------------------------------|-------------------------------------------------------------------------------------------|------------------------------------------|
| Hoffman et al., 2016 [37] | United States | Experimental | 1281 | >40 | Non-institutionalized adults from the United States. | <p>Same conditions for all participants:<br/> Between 2012 - 2014, subjects answered a chemosensory questionnaire from home (questions about smell and taste problems in the last 12 months). They also did a taste exam which consisted of identifying a taste to ensure their taste functions were effective. The subjects had to report their bitter and salt intensity perception. Then, they did a smell test (on scent strips) with eight different odors.</p> | NHANES 8-item pocket smell test | A self-reported questionnaire was used to measure if they were doing physical activities. | Less olfactory dysfunction when doing PA |
|---------------------------|---------------|--------------|------|-----|------------------------------------------------------|----------------------------------------------------------------------------------------------------------------------------------------------------------------------------------------------------------------------------------------------------------------------------------------------------------------------------------------------------------------------------------------------------------------------------------------------------------------------|---------------------------------|-------------------------------------------------------------------------------------------|------------------------------------------|

|                             |               |              |    |      |                                           |                                                                                                                                                                                                                                                                                                                                                                                                                                                                                                                                                                                                                                                                                                                                                                                                                                                                                                                                                                                                                                                                                                                                             |     |                                                                                                                                                |
|-----------------------------|---------------|--------------|----|------|-------------------------------------------|---------------------------------------------------------------------------------------------------------------------------------------------------------------------------------------------------------------------------------------------------------------------------------------------------------------------------------------------------------------------------------------------------------------------------------------------------------------------------------------------------------------------------------------------------------------------------------------------------------------------------------------------------------------------------------------------------------------------------------------------------------------------------------------------------------------------------------------------------------------------------------------------------------------------------------------------------------------------------------------------------------------------------------------------------------------------------------------------------------------------------------------------|-----|------------------------------------------------------------------------------------------------------------------------------------------------|
| Havermans et al., 2009 [38] | United States | Experimental | 58 | 21,9 | Healthy undergraduate psychology students | <p>Same conditions for all subjects: Participants had to consume nothing, including water, two hours before the experimentation. Participants have been randomly divided into two groups (drink or taste). Each group participant had three cups filled with different flavors (A: mali-flavored lemonade syrup, B: sala-flavored lemonade syrup, C: cream soda-flavored syrup). They needed to smell, taste, and drink the solution and then rate their appreciation on a VAS. Participants were then told to complete as much sudoku as possible for 15 minutes, and, right after, they received other VAS about the feeling they experienced (e.g., nausea, need to vomit). Drink group: Participants needed to consume substance A, then run on a treadmill for 30 minutes to finish by consuming substance B. Taste group: Same protocol, but instead of drinking, they only taste and spit the substances. Every group had a 15-minute rest after substance B and needed to solve another sudoku during this period. They finished the experimentation by doing the same evaluation of the three cups with the flavor A, B and C.</p> | VAS | Exercise-induced odor aversion learning: Significant effect between the substance A and C, but not between B and C. No effects between groups. |
|-----------------------------|---------------|--------------|----|------|-------------------------------------------|---------------------------------------------------------------------------------------------------------------------------------------------------------------------------------------------------------------------------------------------------------------------------------------------------------------------------------------------------------------------------------------------------------------------------------------------------------------------------------------------------------------------------------------------------------------------------------------------------------------------------------------------------------------------------------------------------------------------------------------------------------------------------------------------------------------------------------------------------------------------------------------------------------------------------------------------------------------------------------------------------------------------------------------------------------------------------------------------------------------------------------------------|-----|------------------------------------------------------------------------------------------------------------------------------------------------|

|                         |               |                       |      |      |                                                                                                            |                                                                                                                                                                                                                                                                                                                                                                                                                                                                                                                                                                                                                                                                                                                                         |                                                                                |                                       |                                                                                                                                     |
|-------------------------|---------------|-----------------------|------|------|------------------------------------------------------------------------------------------------------------|-----------------------------------------------------------------------------------------------------------------------------------------------------------------------------------------------------------------------------------------------------------------------------------------------------------------------------------------------------------------------------------------------------------------------------------------------------------------------------------------------------------------------------------------------------------------------------------------------------------------------------------------------------------------------------------------------------------------------------------------|--------------------------------------------------------------------------------|---------------------------------------|-------------------------------------------------------------------------------------------------------------------------------------|
| Gallo et al., 2020 [46] | United States | Cross-sectional study | 2972 | 58,1 | Civilians aged over 40 years old in the United States that represent the non-institutionalized population. | <p>Same conditions for all subjects: Questionnaires to do at home about health and chemosensory. Six weeks after the self-administer questionnaires, the participants needed to go to the lab to assess some tests. The first test consisted of anthropometric (BMI and waist circumference) and cardiometabolic measurements (low-density lipoprotein, triglycerides, and glucose). The cardiometabolic measures were only taken on the morning participants because they needed to fast for a minimum of nine hours. The last tests were the smell and taste tests. The smell test consisted of identifying eight different odors presented on a strip. They were then asked to select the correct odor between the four choices.</p> | NHANES 8-item pocket smell test and self-administer chemosensory questionnaire | Self-administer health questionnaires | Participants with olfactory dysfunction (measured) had more chances of being physically inactive and having poor health conditions. |
|-------------------------|---------------|-----------------------|------|------|------------------------------------------------------------------------------------------------------------|-----------------------------------------------------------------------------------------------------------------------------------------------------------------------------------------------------------------------------------------------------------------------------------------------------------------------------------------------------------------------------------------------------------------------------------------------------------------------------------------------------------------------------------------------------------------------------------------------------------------------------------------------------------------------------------------------------------------------------------------|--------------------------------------------------------------------------------|---------------------------------------|-------------------------------------------------------------------------------------------------------------------------------------|

|                             |        |                                   |     |       |                                                                                     |                                                                                                                                                                                                                                                                                                                                                                                                                                                                                                                                                                                                                                                                                   |                 |      |                                                                                                                                                                                                                                                                    |
|-----------------------------|--------|-----------------------------------|-----|-------|-------------------------------------------------------------------------------------|-----------------------------------------------------------------------------------------------------------------------------------------------------------------------------------------------------------------------------------------------------------------------------------------------------------------------------------------------------------------------------------------------------------------------------------------------------------------------------------------------------------------------------------------------------------------------------------------------------------------------------------------------------------------------------------|-----------------|------|--------------------------------------------------------------------------------------------------------------------------------------------------------------------------------------------------------------------------------------------------------------------|
| Falkowski et al., 2017 [43] | Poland | Non-randomised experimental study | 112 | 29-45 | Patients from an outpatient clinic with type 1 diabetes (EXP). Healthy adults (CON) | <p>Same conditions for all subjects:<br/>The participants had a full physical exam, including anthropometric measures, metabolic control of diabetes, diabetic retinopathy, cardiac autonomic neuropathy with an electrocardiogram, blood samples after 12 hours fasting during the night, examination of cavities (ear, nose, throat), and PA level with a questionnaire. Each participant also had an olfactory function test. This evaluation was using 12 pens with usual odors. The odors were each presented for two sec under the participant's nose, and the subject had to select a good answer on four possible odors. This protocol was repeated for the 12 odors.</p> | Sniffin' sticks | IPAQ | Positive correlation between IPAQ scores and olfactory evaluation. No significant differences in the IPAQ scores between healthy adults and patients with type 1 diabetes. In 70% of diabetes patients and 46% of healthy adults, olfactory dysfunction was found. |
|-----------------------------|--------|-----------------------------------|-----|-------|-------------------------------------------------------------------------------------|-----------------------------------------------------------------------------------------------------------------------------------------------------------------------------------------------------------------------------------------------------------------------------------------------------------------------------------------------------------------------------------------------------------------------------------------------------------------------------------------------------------------------------------------------------------------------------------------------------------------------------------------------------------------------------------|-----------------|------|--------------------------------------------------------------------------------------------------------------------------------------------------------------------------------------------------------------------------------------------------------------------|

|                          |                 |              |     |                                                                                                           |                                                                                                   |                                                                                                                                                                                                                                                                                                                                                                                                                                                                                                                                                                                                                                                                                                                                                                                                                                                                                                                                                                                                                                                                                                                                                                                              |                                                          |  |                                                                                                                          |
|--------------------------|-----------------|--------------|-----|-----------------------------------------------------------------------------------------------------------|---------------------------------------------------------------------------------------------------|----------------------------------------------------------------------------------------------------------------------------------------------------------------------------------------------------------------------------------------------------------------------------------------------------------------------------------------------------------------------------------------------------------------------------------------------------------------------------------------------------------------------------------------------------------------------------------------------------------------------------------------------------------------------------------------------------------------------------------------------------------------------------------------------------------------------------------------------------------------------------------------------------------------------------------------------------------------------------------------------------------------------------------------------------------------------------------------------------------------------------------------------------------------------------------------------|----------------------------------------------------------|--|--------------------------------------------------------------------------------------------------------------------------|
| deJong et al., 2000 [39] | The Netherlands | Experimental | 159 | <p>Nutrition group: 79,6<br/>Exercise group: 76,7<br/>Combination group: 79,2<br/>Control group: 79,3</p> | Inactive elderly persons with a BMI lower than 25 and that did not take multivitamin supplements. | <p>Same conditions for all subjects: For the data collection, participants had to answer multiple questions about appetite, hunger, subjective taste and smell, and dietary intake. They also had to complete general and activity questionnaires. Finally, they completed a smell identification test which included ten odors the participants needed to identify. Data were collected at the beginning of the study and the end (after the 17th week). Participants were randomized into four groups: nutrition, exercise, combination, or control. Every participant needed to consume one product of the following categories every day: dairy products and fruit-based products. The nutrition group and combination group included nutrient-dense products. The exercise group and control group included regular products. Also, the exercise and combination groups included an exercise program consisting of two group sessions per week (45 minutes each) at moderate intensity. The two other groups (control and nutrition) had a social program that consisted of 90-minute sessions every two weeks in which they did social activities (lectures, creative activities).</p> | Smell identification test including ten different odors. |  | No significant differences between each group and the control group on the smell test or smell perception questionnaire. |
|--------------------------|-----------------|--------------|-----|-----------------------------------------------------------------------------------------------------------|---------------------------------------------------------------------------------------------------|----------------------------------------------------------------------------------------------------------------------------------------------------------------------------------------------------------------------------------------------------------------------------------------------------------------------------------------------------------------------------------------------------------------------------------------------------------------------------------------------------------------------------------------------------------------------------------------------------------------------------------------------------------------------------------------------------------------------------------------------------------------------------------------------------------------------------------------------------------------------------------------------------------------------------------------------------------------------------------------------------------------------------------------------------------------------------------------------------------------------------------------------------------------------------------------------|----------------------------------------------------------|--|--------------------------------------------------------------------------------------------------------------------------|

|                           |        |              |    |      |                            |                                                                                                                                                                                                                                                                                                                                                                                                                                                                                                                                                                                                                                                                                                                                                                                                                                                                                                                                                                                                                                                                                                                                                                                                                                                                                                                              |                 |                                                                                                                                                                                                                                                                                                                                            |
|---------------------------|--------|--------------|----|------|----------------------------|------------------------------------------------------------------------------------------------------------------------------------------------------------------------------------------------------------------------------------------------------------------------------------------------------------------------------------------------------------------------------------------------------------------------------------------------------------------------------------------------------------------------------------------------------------------------------------------------------------------------------------------------------------------------------------------------------------------------------------------------------------------------------------------------------------------------------------------------------------------------------------------------------------------------------------------------------------------------------------------------------------------------------------------------------------------------------------------------------------------------------------------------------------------------------------------------------------------------------------------------------------------------------------------------------------------------------|-----------------|--------------------------------------------------------------------------------------------------------------------------------------------------------------------------------------------------------------------------------------------------------------------------------------------------------------------------------------------|
| Cameron et al., 2016 [40] | Canada | Experimental | 10 | 23,7 | Male without health issues | <p>Same conditions for all subjects: Participants had to complete the control visit, followed by the two experimental visits in random order. Each visit was separated by a minimum of two weeks. Data were taken on day four of each condition except for olfaction, which was tested on days one and four of each condition. Control condition: participants did a maximal test on a treadmill. Then they went home with an accelerometer, their ad libitum menu for every day and only returned to the laboratory on day four. Smell function was tested during the two visits one hour after eating. Diet condition: participants had breakfast, and one hour later, they had a test of their smell function and relative-reinforcing value of food. They also went home with their food for the period until day four. For this condition, they had less food than the control or exercise group to complete depletion of 25%. Exercise condition: Same protocol as diet condition, except that participants in the exercise group stayed after the olfaction test to complete the aerobic session. Participants did the aerobic session for three straight days. They also had more food to bring home than the diet group. Day four for any group: participants arrived fasted until seven p.m. the night before.</p> | Sniffin' Sticks | <p>Significant amelioration for the odor threshold on day four of the diet group and a trend for day four of the exercise group.</p> <p>No significant differences in the odor threshold between each condition group during day one.</p> <p>No significant differences in odor discrimination and odor identification between groups.</p> |
|---------------------------|--------|--------------|----|------|----------------------------|------------------------------------------------------------------------------------------------------------------------------------------------------------------------------------------------------------------------------------------------------------------------------------------------------------------------------------------------------------------------------------------------------------------------------------------------------------------------------------------------------------------------------------------------------------------------------------------------------------------------------------------------------------------------------------------------------------------------------------------------------------------------------------------------------------------------------------------------------------------------------------------------------------------------------------------------------------------------------------------------------------------------------------------------------------------------------------------------------------------------------------------------------------------------------------------------------------------------------------------------------------------------------------------------------------------------------|-----------------|--------------------------------------------------------------------------------------------------------------------------------------------------------------------------------------------------------------------------------------------------------------------------------------------------------------------------------------------|

BMI: body mass index; FE: forced exercise; IPAQ: International Physical Activity Questionnaire; ODT: olfactory detection threshold; PA: physical activity; PNIF: peak nasal inspiratory flow; SDOIT: San Diego Odor Identification Test; UPSIT: University of Pennsylvania Smell Inventory Test; VAS: visual analogue scale;

Table 2. Protocol description

| Author                    | Variables measured                                                                                                                                                                                    | Type of exercise description                                                                                                                                                                                                                                                                                                                                                                                                                                                                                                                                                                                                                                               | Olfactory experimental protocol                                                                                                                                                                                                                                                                                                                                                                                                                                                            | Type of olfactory tests description                                                                                                                                                                                                                                                                  | Tests duration |
|---------------------------|-------------------------------------------------------------------------------------------------------------------------------------------------------------------------------------------------------|----------------------------------------------------------------------------------------------------------------------------------------------------------------------------------------------------------------------------------------------------------------------------------------------------------------------------------------------------------------------------------------------------------------------------------------------------------------------------------------------------------------------------------------------------------------------------------------------------------------------------------------------------------------------------|--------------------------------------------------------------------------------------------------------------------------------------------------------------------------------------------------------------------------------------------------------------------------------------------------------------------------------------------------------------------------------------------------------------------------------------------------------------------------------------------|------------------------------------------------------------------------------------------------------------------------------------------------------------------------------------------------------------------------------------------------------------------------------------------------------|----------------|
| Bhalla et al., 2018 [31]  | Olfaction, and cognition                                                                                                                                                                              | Exercise group modality: On three non-consecutive days per week, participants had to do a 20-minute walk on a treadmill at 1.7 mph with speed increasing to reach 40-55% of their maximal heart rate during the first four weeks. Speed and duration increased every week to reach new intensities and to reach a 40-minute exercise. For example, for weeks 5-18, participants had to reach 50-65% of their maximal heart rate; for weeks 19-26, they needed to be at 60-75%. Stretching group modality: Participants had to complete nonaerobic exercises such as core strengthening and yoga (different each week). They needed to keep their heart rate under 100 bpm. | Participants had to complete the UPSIT test before and after the 26-week program. This test included 40 different odors, and participants had to inhale the odor stick that was presented to them.                                                                                                                                                                                                                                                                                         | Participants needed to choose the correct answer between the multiple choices. Each good answer gave them one point for a total of 40 points.                                                                                                                                                        | 26 weeks       |
| Zhang et al., 2020 [41]   | Mini-mental state examination score, odor identification score, odor threshold score, and personal information (PA level, sex, age, weight, smoking, drinking, education, drug use, surgical history) | Participants who did 30 minutes of PA more than 3x/week were in the exercise group.                                                                                                                                                                                                                                                                                                                                                                                                                                                                                                                                                                                        | Odor identification test modality: Participants had to inhale 16 odorants well known by China's population. The two nostrils were tested. When participants inhaled the odor presented on the Sniffin' Stick, they needed to choose the correct odor.<br>Odor threshold test modality: Participants had 16 solutions of n-butanol to inhale. Each solution was presented with two other sticks without odor. Participants had to choose the stick with the odor between the three choices. | Odor identification test: Participants had to choose the correct odor. One point was given for each good answer for a total of 16 points.<br>Odor threshold test: Participants had to find the stick with the n-butanol solution. One point was given for each good answer for a total of 16 points. | 1-2 hours      |
| Tonacci et al. 2016 [42]  | Olfactory function, body composition, and sleep.                                                                                                                                                      | Subjects completed the race: Tor des Géants in 150 hours maximum. This race included 332,5 km with a 24000 meters positive elevation.                                                                                                                                                                                                                                                                                                                                                                                                                                                                                                                                      | 16 Sniffin' sticks presented to the athlete before the race, during it and one hour before the finish line. The subjects had to choose the good odor of each 16 different Sniffin sticks between four choices.                                                                                                                                                                                                                                                                             | After being exposed to the odor, the participant had to choose the good one between four choices. Each good answer gave one point for a total of 16.                                                                                                                                                 | 3 sessions     |
| Terashi et al., 2019 [32] | Visual, frontal and space function, behavior, depression, olfactory function, and motor symptoms.                                                                                                     | Participants had to wear the MIMAMORI-Gait device for 24 hours during their routine. The data collection started at ten a.m. and stopped at ten a.m. the next day. They were asked to continue their normal routine and avoid exceptional physical exercise.                                                                                                                                                                                                                                                                                                                                                                                                               | Twelve odor sticks with familiar odors were presented to the subject.                                                                                                                                                                                                                                                                                                                                                                                                                      | After the exposition to the odor sticks, they had to identify the correct odors.                                                                                                                                                                                                                     | 1 session      |

|                         |                    |                                                                                                                                      |                                                                                                                                                                                                                                                                                                                                                                                                                                                                                                                                  |                                                                                              |            |
|-------------------------|--------------------|--------------------------------------------------------------------------------------------------------------------------------------|----------------------------------------------------------------------------------------------------------------------------------------------------------------------------------------------------------------------------------------------------------------------------------------------------------------------------------------------------------------------------------------------------------------------------------------------------------------------------------------------------------------------------------|----------------------------------------------------------------------------------------------|------------|
| Stone et al., 1967 [33] | Olfactory function | They had to cycle at 20 mph in free wheel one min prior to the odor test and continue the same exercise during the entire odor test. | The subject was in an air-dilution olfactometer where odors were diffused. Each smell was presented for ten sec. There was also a 15-sec interval between each odor presentation. The five odors were heptanol, octanol, cyclohexanone, methyl isobutyl ketone, and methone. "Blank" smells were also presented. Each session included four estimates of the detection thresholds for each participant. At the end of the four sessions, each participant had 16 estimates of the detection thresholds, eight in each condition. | After exposure to the odor, the subject had to say if he detected or not the odor presented. | 4 sessions |
|-------------------------|--------------------|--------------------------------------------------------------------------------------------------------------------------------------|----------------------------------------------------------------------------------------------------------------------------------------------------------------------------------------------------------------------------------------------------------------------------------------------------------------------------------------------------------------------------------------------------------------------------------------------------------------------------------------------------------------------------------|----------------------------------------------------------------------------------------------|------------|

|                              |                                                                |                                                                      |                                                                                                                                                                                                                                                                                                                                                                                                                                                                                                                                                                                                                                                                                                                                               |                                                                                                                                                                                                                                                                                                                                                                                                                                                                                                                                             |           |
|------------------------------|----------------------------------------------------------------|----------------------------------------------------------------------|-----------------------------------------------------------------------------------------------------------------------------------------------------------------------------------------------------------------------------------------------------------------------------------------------------------------------------------------------------------------------------------------------------------------------------------------------------------------------------------------------------------------------------------------------------------------------------------------------------------------------------------------------------------------------------------------------------------------------------------------------|---------------------------------------------------------------------------------------------------------------------------------------------------------------------------------------------------------------------------------------------------------------------------------------------------------------------------------------------------------------------------------------------------------------------------------------------------------------------------------------------------------------------------------------------|-----------|
| Sollai and Crnjar, 2021 [34] | Olfactory function, physical, social, and cognitive activities | Their level of PA was evaluated with a succession of four questions. | <p>Test one (olfactory threshold): 16 groups of three pens. Each group had two pens with a solvent and the third one with an n-butanol. The goal was to identify the pen with n-butanol. If the subject identified it two times in a row, a reversal of the scale begins. The end of the test happened when the seventh scale was completed. Test two (odor discrimination): 16 groups of three pens with two with the same odor and one with a different. The goal was to identify the one with the different odor.</p> <p>Test three (odor identification): 16 pens with familiar odors. Every time after smelling a pen, they had to choose one item in a force-choice procedure. The addition of the three tests was the final score.</p> | <p>Test one (olfactory threshold): after exposition to the three pens, the participant had to choose the one with an n-butanol odor. Test two (odor discrimination): after exposition to the three pens, the participant had to identify the one with the different odor. Correct answers (0 to 16). Test three (odor identification): after exposition to each pen, the participant had to choose 1 item in a force-choice procedure. Correct answers (between 0 and 16). For the total, they added up the results of the three tests.</p> | 1 session |
|------------------------------|----------------------------------------------------------------|----------------------------------------------------------------------|-----------------------------------------------------------------------------------------------------------------------------------------------------------------------------------------------------------------------------------------------------------------------------------------------------------------------------------------------------------------------------------------------------------------------------------------------------------------------------------------------------------------------------------------------------------------------------------------------------------------------------------------------------------------------------------------------------------------------------------------------|---------------------------------------------------------------------------------------------------------------------------------------------------------------------------------------------------------------------------------------------------------------------------------------------------------------------------------------------------------------------------------------------------------------------------------------------------------------------------------------------------------------------------------------------|-----------|

|                              |                                                                                                                       |                                                                                                                                                                                                                                                                                                                                                                                                                                                                                                                                                                                                                                                                                                                                               |                                                                                                                                                                                                                                                                                                                                                 |                                                                                                                                                                                  |                      |
|------------------------------|-----------------------------------------------------------------------------------------------------------------------|-----------------------------------------------------------------------------------------------------------------------------------------------------------------------------------------------------------------------------------------------------------------------------------------------------------------------------------------------------------------------------------------------------------------------------------------------------------------------------------------------------------------------------------------------------------------------------------------------------------------------------------------------------------------------------------------------------------------------------------------------|-------------------------------------------------------------------------------------------------------------------------------------------------------------------------------------------------------------------------------------------------------------------------------------------------------------------------------------------------|----------------------------------------------------------------------------------------------------------------------------------------------------------------------------------|----------------------|
| Schubert et al., 2017 [45]   | Height, weight, BMI, ODT, PA level, mental state, and health history                                                  | <p>ODT test modality: Participants had to inhale different concentrations of butanol solution (level 1 = strongest; level 13 = weakest). They started the test at level 8, and they received two puffs, one without odor and the odor with the solution. They had to choose the puff with the odor. If they had it right two times in a row, they went to level 9, which is a weaker solution. On the other hand, if they had it wrong, they went two levels stronger (e.g., level 6). The test stopped when they had three errors in a row or four consecutive level 1 presentations. Odor identification test modality: Every 45 seconds, participants inhaled a different odor a total of eight times and had to identify what it was.</p> | <p>ODT score was the weakest solution that the participant has been able to detect. It was calculated with the mean of the levels of its last two errors. Odor identification: Participants had to choose the correct answer after inhaling the odour. Each good answer gave them one point for a total of eight points.</p>                    | Data collection was included in the 21-year follow-up examinations of the Epidemiology of Hearing Loss Study.                                                                    |                      |
| Schubert et al., 2013 [47]   | Height, weight, BMI, hemoglobin A1C, education, lifestyle, medical history, olfactory function, and exercise quantity | <p>Participants had to complete the San Diego Odor Identification test, which included eight odors. Each odor was presented with a delay of 45 seconds between them.</p>                                                                                                                                                                                                                                                                                                                                                                                                                                                                                                                                                                      | <p>They had to choose the correct answer between 20 odors, including the eight common odors tested. If they had the wrong answer, they were given the correct one, and the odor was presented a second time later in the experiment. The score represents the number of good identifications after two trials, for a total of eight points.</p> | 1 visit almost every 5 years for 16 years (Total = 3 visits)                                                                                                                     |                      |
| Rosenfeldt et al., 2016 [35] | Heart rate reserve, cadence, and olfaction scores                                                                     | <p>Exercise modality: Cardiopulmonary exercise test on a fixed bike at a self-selected pace, including a 10-minute warm-up, 40 minutes exercise set and a 10-minute cooldown.</p>                                                                                                                                                                                                                                                                                                                                                                                                                                                                                                                                                             | <p>Participants took the UPSIT test. This test had 40 "scratch and sniff" odors. This test was performed before and after the treatment, and four weeks after the last session.</p>                                                                                                                                                             | <p>After scratching and sniffing, the participants needed to select the correct answer between four choices. Each good answer gave them one point, for a total of 40 points.</p> | 3x/week for 8 weeks. |



|                             |                                                                                                                                                                      |                                                                                                                                                                                                                                                                                                                        |                                                                                                                                                                                                                                                                                                                                                                                                                                                                                                                                                                                                    |                                                                                                                                                                                                |                                         |
|-----------------------------|----------------------------------------------------------------------------------------------------------------------------------------------------------------------|------------------------------------------------------------------------------------------------------------------------------------------------------------------------------------------------------------------------------------------------------------------------------------------------------------------------|----------------------------------------------------------------------------------------------------------------------------------------------------------------------------------------------------------------------------------------------------------------------------------------------------------------------------------------------------------------------------------------------------------------------------------------------------------------------------------------------------------------------------------------------------------------------------------------------------|------------------------------------------------------------------------------------------------------------------------------------------------------------------------------------------------|-----------------------------------------|
| Marioni et al., 2010 [36]   | PNIF, and olfactory thresholds                                                                                                                                       | Exercise modality: The exercise test on the treadmill included a one-minute warm-up, followed by ten minutes at their anaerobic threshold speed. Then, the speed was increased every 30 seconds by 10% until exhaustion.                                                                                               | Before and after the exercise test, participants had nasal tests. During these tests, they tested the PNIF and the olfactory thresholds. For the PNIF, participants had to inhale and exhale as hard and fast as possible, only with their noses. Participants completed a quick test called Le Nez du Vin for the olfactory thresholds. They did the Sniffin' sticks test if they had only one error or less. For the Sniffin' sticks test, 16 odors were used. During the test, triplets were presented with two solvents and the third with an odorant. Triplets were presented for 20 seconds. | For the PNIF, two maximal inspirations were kept (the highest ones). For the Sniffin' sticks test, participants could have scored between 1 and 16.                                            | 2 sessions separated by at least a week |
| Josaphat et al., 2020 [44]  | Taste perception, smell perception, appetite sensation, and energy intake                                                                                            | During the preliminary visit, a progressive treadmill test was administered. This test started at 8 km/h, and the speed increased by 0.5km/h each minute. For the experimental visits, participants had to run on a treadmill for 30 minutes at 70% of their VO <sub>2</sub> max, calculated at the preliminary visit. | 12 Sniffin' Sticks were used to test olfactory functions between each experimental visit. Sticks were placed randomly at 2.5 centimeters in front of the participants for approximately 30 seconds. Odors were food and non-food odors.                                                                                                                                                                                                                                                                                                                                                            | After the 30 seconds inhalation, they needed to rate the intensity and pleasantness of the smell on a VAS.                                                                                     | 3 sessions                              |
| Hoffman et al., 2016 [37]   | Taste intensity, olfactory function, participants' characteristics, and lifestyles.                                                                                  | Self-reported questionnaires. Participants were active if they did 3x/week at least ten minutes of vigorous PA per session.                                                                                                                                                                                            | Scent strips of eight different odors: strawberry, chocolate, onion, grapes, smoke, gas, leather soap. The NHANES employee had to scratch the strip to release the odor.                                                                                                                                                                                                                                                                                                                                                                                                                           | After inhaling the odor, participants had to identify the good one between four choices. Each good answer gave 1 point for a total of 8. A score of 5 or lower meant an olfactory dysfunction. | 1 session                               |
| Havermans et al., 2009 [38] | Taste rating, and odor rating                                                                                                                                        | Exercise modality: 30 minutes treadmill run at 80% of their maximal heart rate.                                                                                                                                                                                                                                        | Three cups with different flavors were presented to the participants. The flavors were mali-flavored lemonade syrup, sala-flavored lemonade syrup, and cream soda-flavored syrup. Each of these flavors was added to water for a ratio of 1/10. Participants had to smell each cup, then taste it and drink it. This protocol was done at the beginning and the end of the experimentation.                                                                                                                                                                                                        | After the actions for each cup, participants had to complete VAS to rate how much they liked or disliked the odor and the taste.                                                               | 1-hour session                          |
| Gallo et al., 2020 [46]     | Olfactory function, BMI, waist circumference, triglycerides, glucose, low-density lipoprotein, demographic characteristics, health conditions, PA level, and smoking | Exercise quantity was evaluated with self-reported questionnaires. They were physically active if they did at least ten minutes of moderate-vigorous PA 3x/week.                                                                                                                                                       | Participants were presented with strips with different odors (four food odors, two warning odors and two common odors). The strip was placed in front of the participants to sniff it.                                                                                                                                                                                                                                                                                                                                                                                                             | Participants needed to choose a good answer between the four choices that were presented to them for each odor stick. Each good answer gave 1 point for a total of 8 points.                   | 6 weeks                                 |

|                             |                                                                                                                                                                                                              |                                                                                                                                                                                                                                                                                                |                                                                                                                                                                                                                                                                                                                                                                                                                                                                                                                                                                                                      |                                                                                                                                                                                                                                       |                                                                |
|-----------------------------|--------------------------------------------------------------------------------------------------------------------------------------------------------------------------------------------------------------|------------------------------------------------------------------------------------------------------------------------------------------------------------------------------------------------------------------------------------------------------------------------------------------------|------------------------------------------------------------------------------------------------------------------------------------------------------------------------------------------------------------------------------------------------------------------------------------------------------------------------------------------------------------------------------------------------------------------------------------------------------------------------------------------------------------------------------------------------------------------------------------------------------|---------------------------------------------------------------------------------------------------------------------------------------------------------------------------------------------------------------------------------------|----------------------------------------------------------------|
| Falkowski et al., 2017 [43] | Olfactory function, IPAQ Scores, BMI, low-density lipoprotein cholesterol, high-density lipoprotein cholesterol, triglycerides, Type 1 diabetes duration, and glycated hemoglobin A1C                        | PA level was evaluated with the IPAQ.                                                                                                                                                                                                                                                          | Twelve odors pens (sniffin' sticks) were presented for two seconds, two centimeters under the participant's nose. Each stick has a well-known odor.                                                                                                                                                                                                                                                                                                                                                                                                                                                  | After the exposition of the odor, the participant needed to choose the good odor between the four choices. Each good answer gave 1 point for a total of 12. A final score under 11 meant a significant olfactory dysfunction.         | 1 session                                                      |
| deJong et al., 2000 [39]    | Smell, appetite, taste perception, and feeling of hunger                                                                                                                                                     | Exercise quantity: Participants had to complete an activity questionnaire (PASE). Some groups (exercise and combination) also performed PA twice a week in a group for 45 minutes at a moderate intensity. The exercises focused on strength, coordination, flexibility, speed, and endurance. | The smell experimentation included ten different odors. Each odor was presented to the participants in a 40mL plastic jar with holes in the lid.                                                                                                                                                                                                                                                                                                                                                                                                                                                     | After inhaling the odor, participants had to identify the odor by choosing the correct answer from the list containing 20 choices (ten tested odors and ten random choices). Each good answer gave 1 point, for a total of 10 points. | 17 weeks                                                       |
| Cameron et al., 2016 [40]   | Height, weight, body composition, attitude toward eating, VO <sub>2</sub> max, energy expenditure, leptin, ghrelin, energy intake, appetite, palatability, relative-reinforcing value of food, and olfaction | Exercise modality: Participants had to complete the aerobic exercise for three straight days. The exercise was at 50% of their VO <sub>2</sub> max until they reached a 25% depletion.                                                                                                         | Participants had three tests to complete: Participants were presented with three sticks. Only one of them had an odor (n-butanol). They needed to identify the odorous one for 16 triplets. The second test also presented three sticks simultaneously to the participants. Although they all had an odor this time, two sticks had the same, and the other had a different odor. They needed to identify the stick with the unique odor for 16 triplets. The last test consisted of smelling one stick and choosing the correct answer between four choices. They repeated this test for 16 sticks. | For each test, participants had 1 point if they had the correct answer and no point if they had the wrong answer. Each test had a total of 16 points.                                                                                 | 3 sessions separated by at least 2 weeks between each session. |

BMI: body mass index; IPAQ: International Physical Activity Questionnaire; ODT: olfactory detection threshold; PA: physical activity; PNIF: peak nasal inspiratory flow; UPSIT: University of Pennsylvania Smell Inventory Test; VAS: visual analogue scale; VO<sub>2</sub>max: maximum oxygen uptake;

### 3.4 Effect of PA on the Three Components of Olfactory Acuity

*Odor detection threshold.* Of the 17 studies, six of them tested odor detection thresholds [33, 34, 36, 40, 41, 45]. While two studies showed no significant effect of PA on odor detection thresholds [33, 36], all the others showed significantly higher scores for the odor detection thresholds for the people who were physically more active (e.g., better detection threshold scores by 15% [41]).

*Odor identification.* Twelve studies explored odor identification [31, 32, 34, 35, 37, 39-43, 46, 47]. Four of these 12 studies showed no significant effect of PA on odor identification [31, 32, 39, 40]. Although one study showed a significant decrease in odor detection after a long PA session, more specifically after an ultramarathon of 332,5 km [42], the seven other studies reported a significant increase in odor identification in the physically active group (e.g., better identification scores by 13.12% [41]) [34, 35, 37, 41, 43, 46, 47].

*Odor appreciation/intensity.* In two studies in which appreciation and intensity of odors were assessed, it was revealed that an acute PA session significantly increased the perceived intensity and appreciation aversion [38, 44]. Nevertheless, these results seem to be odor-dependent, and the effect might change with different odors. For example, PA significantly increases odor intensity with food-related odors such as coffee and orange, which was not the case for non-food-related odors such as leather and rose.

### 3.5 Risk of Bias Assessment

While most of the studies had non-existent bias risks/applicability concerns, some were deemed as ‘unclear’ OR at ‘high risk’ of bias/applicability concerns (Table 3). Concerning patient selection, out of the 17 studies included in this review, two had an unclear potential risk of bias [45, 47], and one was considered at a higher risk [33]. Also, concerning reference standards, three studies were deemed unclear for their potential risk of bias [33, 42, 43]. Concerning flow and timing, two were classified as unclear [32, 34]. Concerning patient selection, four studies were categorized as unclear for their applicability concerns [33, 42, 45, 47]. Concerning the index test, only one study was classified at a higher risk for applicability concerns [32]. Finally, concerning reference standards, two were deemed unclear applicability concerns [33, 43]. While there were two instances where studies were classified at a higher risk of bias/applicability concerns [32, 33], their methodology and overall framework still made them eligible for data extraction in this systematic review.

Table 3. Risk of Bias Assessment [30]

| Author, year                 | Risk of Bias      |            |                    |                 | Applicability Concerns |            |                    |
|------------------------------|-------------------|------------|--------------------|-----------------|------------------------|------------|--------------------|
|                              | Patient Selection | Index Test | Reference Standard | Flow and Timing | Patient Selection      | Index Test | Reference Standard |
| Bhalla et al., 2018 [31]     | (+)               | (+)        | (+)                | (+)             | (+)                    | (+)        | (+)                |
| Zhang et al., 2020 [41]      | (?)               | (+)        | (+)                | (+)             | (+)                    | (+)        | (+)                |
| Tonacci et al., 2016 [42]    | (+)               | (+)        | (?)                | (+)             | (?)                    | (+)        | (+)                |
| Terashi et al., 2019 [32]    | (+)               | (+)        | (+)                | (?)             | (+)                    | (-)        | (+)                |
| Stone et al., 1967 [33]      | (-)               | (+)        | (?)                | (+)             | (?)                    | (+)        | (?)                |
| Sollai et Crnjar, 2021[34]   | (+)               | (+)        | (+)                | (?)             | (+)                    | (+)        | (+)                |
| Schubert et al., 2017 [45]   | (?)               | (+)        | (+)                | (+)             | (?)                    | (+)        | (+)                |
| Schubert et al., 2013 [47]   | (?)               | (+)        | (+)                | (+)             | (?)                    | (+)        | (+)                |
| Rosenfeldt et al., 2016 [35] | (+)               | (+)        | (+)                | (+)             | (+)                    | (+)        | (+)                |
| Marioni et al., 2010 [36]    | (+)               | (+)        | (+)                | (+)             | (+)                    | (+)        | (+)                |
| Josaphat et al., 2020 [44]   | (+)               | (+)        | (+)                | (+)             | (+)                    | (+)        | (+)                |
| Hoffman et al., 2016 [37]    | (+)               | (+)        | (+)                | (+)             | (+)                    | (+)        | (+)                |
| Havermans et al., 2009 [38]  | (+)               | (+)        | (+)                | (+)             | (+)                    | (+)        | (+)                |
| Gallo et al., 2020 [46]      | (+)               | (+)        | (+)                | (+)             | (+)                    | (+)        | (+)                |
| Falkowski et al., 2017 [43]  | (+)               | (+)        | (?)                | (+)             | (+)                    | (+)        | (?)                |
| deJong et al., 2000 [39]     | (+)               | (+)        | (+)                | (+)             | (+)                    | (+)        | (+)                |
| Cameron et al., 2016 [40]    | (+)               | (+)        | (+)                | (+)             | (+)                    | (+)        | (+)                |

(+)—Low Risk; (-)—High Risk; (?)—Unclear Risk.

## 4 Discussion

The objective of this systematic review was to document the effect of PA on olfactory acuity. After the selection process, 17 studies were included. For the odor detection thresholds, four studies showed increased scores [34, 40, 41, 45], and two studies showed no significant results [33, 36]. For odor identification, seven showed an increase [34, 35, 37, 41, 43, 46, 47], one study showed a significant decrease following a prolonged PA session [42], and four studies showed no significant results [31, 32, 39, 40]. For odor appreciation/intensity, one of two studies showed an increase in intensity [44], while the other showed a significant appreciation aversion [38].

### 4.1 Odor Detection Thresholds

The effect of PA on odor detection thresholds has been explored by six studies [33, 34, 36, 40, 41, 45]. Half of these studies compared before and after PA intervention [33, 36, 40], while the other half compared an active and inactive group on a daily basis [34, 41, 45]. Four of the six studies revealed that PA increased odor detection thresholds [34, 40, 41, 45]. Studies that compared active and inactive groups on a daily basis all showed significant increases in odor detection threshold in the active group [34, 41, 45]. Also, two of the three studies that compared before and after a single PA intervention in the same group had no significant results [33, 36]. The only study that offered the same comparison with a significant increase had a longer total intervention. Indeed, the total duration of the experimental protocol lasted four days including three straight days of PA sessions, and significant results were obtained during the last day of the testing, which was on the fourth day [40]. All these results suggest that chronic PA would yield a better impact on odor detection thresholds than acute exercise.

Exercise intensity also seems an important variable to consider with the improvement of odor detection thresholds. Indeed, Zhang, Li [41] compared results between different exercise modalities and highlighted better olfactory outcomes for those who practiced dancing (3-11.3 metabolic equivalents (METs); thresholds score: 8.1/16) or running (3.5-23 METs; thresholds score: 7.4/16) in comparison to walking (1.5-3.8 METs; thresholds score: 4.0/16) [48]. Knowing that dancing and running can be performed at high intensity and that high-intensity exercise induces an anorexigenic effect [49, 50], which means a reduced energy intake following exercise, the hormonal changes described thereafter might play a role in this increased odor detection thresholds [3, 51].

Also, with the knowledge that chronic PA can generate weight loss by increasing energy expenditure and modulating some hormones by lowering leptin levels [52, 53], those two factors might play a crucial role in the odor detection threshold's function. Indeed, in a systematic review by Peng, Coutts [3], there was a negative association between odor detection threshold and participant's weight. Also, obesity is often associated with metabolic and hormonal dysfunctions, which can negatively impact the olfactory function. More precisely, obesity is positively correlated with lower ghrelin levels [3, 54], which stimulates the olfactory bulb, and with higher leptin, which is an olfactory inhibitor [3]. The differences between studies with a PA intervention (acute) and studies with a physically active group on a daily basis (chronic) might be due to the differences that chronic vs acute PA have on weight and hormone levels.

## 4.2 Odor Identification

The effect of PA on odor identification was the most documented olfactory component. In this review, 12 of the 17 studies covered this topic. Five studies compared odor identification before and after a PA intervention [31, 35, 39, 40, 42]. Three of them showed no significant effect of PA [31, 39, 40], and one showed a decrease in odor identification after PA [42]. This negative change in olfaction following an exercise session might have been produced by the extreme effort in this study as participants ran an ultra-marathon (332,5 km). However, this result is not consistent with hormonal changes that happened during and following such efforts. In fact, Roupas, Mamali [55] demonstrated that hormones such as leptin and insulin are significantly lowered following an ultra-marathon. As previously discussed, those changes should increase olfactory sensitivity [3, 51].

From the seven other studies comparing active and inactive groups on a daily basis [32, 34, 37, 41, 43, 46, 47], only one had no significant results [32]. Although acute PA seems to have little to no impact on odor identification, chronic PA produced much more conclusive and positive results. Once again, this effect might be related to weight loss and hormonal changes associated with the regular practice of PA. However, Peng, Coutts [3] identified no changes between different weight groups for odor identification in their systematic review, even though they admitted that the literature included conflicting results. For the hormonal changes, studies demonstrated that higher fasting blood glucose levels and hypertension might increase the risk of olfactory impairment by diminishing ghrelin and increasing leptin levels [3, 28]. Long-term PA might help regulate these hormones and protect the sense of smell [53].

Furthermore, Serby [56] demonstrated that odor identification decreased in patients with Parkinson's and Alzheimer's disease compared to healthy people of the same age. Jalali, Roudbary [2] also explained that odor identification varied between Parkinson's patients and their stages in the disease. In the present review, three studies had patients with neurodegenerative disease, two with Parkinson's [32, 35] and one with Alzheimer's [31]. Rosenfeldt, Dey [35] documented a significant improvement of the odor identification score following an aerobic exercise with Parkinson's patients (e.g., UPSIT scores four weeks after the treatment: the exercise group had +0.2 points and the control group had -2.7 points versus the baseline evaluation). Alternatively, Terashi, Taguchi [32] showed no association between olfactory dysfunction and physical activity. In these three studies, diagnosed populations were compared altogether. Even though there are only a few studies with neurodegenerative participants, those results are less optimistic than studies with healthy populations that had better odor identification scores after PA. Those non-significant results with neurodegenerative patients suggest that the effect of PA is population-specific. This difference in the odor identification ability between healthy and neurodegenerative patients might be explained by various factors dependent of the specific disease [57]. For Alzheimer's and Parkinson's patients, one of the factors might be the higher reduction of the olfactory bulb volume [57-62]. A study by Brown, Cooper-Kuhn [63] showed that PA could not protect against the neurogenesis of the olfactory bulb. This fact could explain the differences observed in term of odor identification in the studies included in this review.

### 4.3 Odor Appreciation/Intensity

With the lack of articles in the literature regarding the effect of PA on odor appreciation and intensity, this review only identified two studies on this topic [38, 44]. These studies compared the results of before and after an intervention, showing a significant increase in odor intensity [44] and odor appreciation aversion [38]. These two studies focused on young participants and used visual analogue scales to measure odor appreciation/intensity, which might explain their consistent results. They also documented significant effect of PA on odor appreciation/intensity with some odors such as coffee and orange and no effect with other odors such as rose, which suggest that the effect of PA intervention is odor-specific. In fact, PA intervention changed the perception of food-related odors only. A study by Sorokowska, Schoen [64] highlighted that the right insula, anterior cingulate cortex, and putamen brain regions involved in odor processing are more active in response to food-related odors than other type of odor, which may explain these results. Indeed, those brain regions play a key role in reward loops, and hormonal changes such as higher ghrelin, which normally happens before eating, can affect those brain regions [64, 65]. Also, as mentioned earlier in the discussion, ghrelin is a hormone which stimulates the olfactory bulb [3]. Therefore, a higher concentration of this hormone could generate odor aversion [66]. However, it is important to note that it is unlikely that a higher ghrelin level is caused by the PA intervention since a systematic review showed that the ghrelin level will change after chronic physical activity practice and not acute [67]. In light of that information, food odor may have the ability to increase the activation of some brain regions while non-food odor would not. Therefore, these results align with the findings of both studies included in this systematic review.

Another potential cause for the effect of PA on odor intensity might be related to the timing of the testing sequence of the olfactory tests. Indeed, as evidenced by Josaphat, Drapeau [44], there was an increase in odor intensity between 8:30 a.m., and 11:30 a.m., which evidences a time-related effect and not a treatment effect which is the PA intervention. Therefore, it seems possible that the delay between the last energy intake and the odor presentation could impact the perception of odor intensity. In the same direction, ghrelin level, an olfactory stimulator [3], increases as the last caloric ingestion is far away [68]. However, more studies on odor appreciation and intensity are needed to explore these hypotheses, and protocols should identify specific timing for PA intervention and odor tests.

### 4.4 How Can We Measure Olfactory Acuity with a Novel Scope and How Can We Produce More Robust Results?

Over the years, studies that investigated the effect of PA on olfactory acuity have used different experimental paradigms. Some standardized the conditions before the experimentation [31, 33, 35, 36, 38-40, 44] while others tested in natural conditions the participant [32, 34, 37, 41-43, 45-47]. Even though the latter has been useful in determining the effect of acute and chronic PA on olfactory acuity, better standardization of the pre-experimentation conditions would generate more robust results. For example, knowing that hormonal changes can affect olfactory acuity [3], the exact time of the day the experimentation takes place should be controlled. This concept has been well documented in the study of Josaphat, Drapeau [44], which evidenced a time effect on the perceived intensity of food-related odors. Also, all participants should have the same relative energy

intake before/during the experimentation to limit hormonal variations since olfaction can vary depending on the satiety state [69]. Furthermore, studies should measure participants' bodyweight and use this bodyweight status for further analysis since hormone levels, such as ghrelin, change with this variable [3, 53].

In addition, future research should use more precise and easily regulated tools in odor testing. Indeed, most studies included in this review used Sniffin' Sticks and questionnaires. Although these methods are commonly used, perhaps due to their simplicity, a more objective approach could strengthen the results. In this sense, some recent studies have started using an automatic olfactometer and an electroencephalogram to measure brain responses to odor stimuli [70, 71]. Therefore, this method makes it possible to understand better the brain mechanisms linked to the sense of smell while obtaining reproducible results. The same aspect about regulated tools should apply to PA. Indeed, it is also necessary to better monitor exercise to understand better which exercise modality (frequency, intensity, time, and type) is optimal for improving olfactory acuity.

#### 4.5 Strengths and Limitations

Most of the studies included in this systematic review were relatively recent with the majority published in the last ~10 years. This observation made it possible to have consistency in data collection and methods. In fact, every study that assessed the acute effect of PA used aerobic exercise such as running on a treadmill or pedalling on an ergometer, limiting findings to cardiovascular exercises. This review also included two types of PA, chronic and acute, which made possible to cover a larger portion of the literature to highlight the effects of each one. For odor appreciation and intensity, although a very small number of studies explored this concept, they both used a visual analogue scale, considered the gold standard for subjective sensory data collection [72]. The main limitation would be the time of the day at which data collection was made in every study. There was no consistency between each study for this parameter, which may have modulated the participants' hunger level/hormones during the olfactory stimulations. Also, the measurement of PA could have been more precise since most of the studies used self-reported questionnaires [34, 37, 41, 43, 45-47]. Indeed, a study demonstrated that a questionnaire such as the International Physical Activity Questionnaire-Long Form overestimates PA time and underestimates sedentary behavior time [73]. All those inconsistencies in the methods made the possibility of performing a meta-analysis impossible. Better measurements of PA could help find the impact of its effect on olfactory thresholds, identification, and appreciation/intensity. In addition, studies rarely measured participants' bodyweight and body composition to compare them with those having a similar bodyweight but different PA levels. Considering that hormone levels can change with PA and with bodyweights, bodyweight status and PA levels should be controlled to provide more robust results [3, 53]. Since this review includes all the studies mentioned in this paragraph, the same strengths and limitations apply to this review.



## 5 Conclusion

Physical activity, especially chronic, can improve olfactory acuity. More precisely, the detection threshold, identification, and intensity of odors are improved with a chronic practice of PA. Concerns about the loss of smell have recently surfaced in the healthcare community. Therefore, studies evaluating the impact of PA on the sense of smell are important to deepen our understanding of this therapeutic intervention on olfactory acuity.

**Acknowledgement:** The authors thank Denis Arvisais for his help with the search strategy.

**Funding:** Mathieu Cournoyer and Alexandre-Charles Gauthier received scholarships from the Université de Montréal. Fabien Dal Maso is a research scholar from the Fonds de recherche du Québec – Santé (Junior 1). Marie-Eve Mathieu holds a Canada Research Chair (Tier 2).

**Disclosure of interest:** The authors declare no conflict of interest.

1. Galvan, V. and D.E. Bredesen, *Neurogenesis in the adult brain: implications for Alzheimer's disease*. CNS & Neurological Disorders Drug Targets, 2007. **6**(5): p. 303-10.
2. Jalali, M.M., et al., *Olfactory Identification among Various Subtypes of Parkinson Disease*. European Neurology, 2019. **81**(3-4): p. 167-173.
3. Peng, M., et al., *Systematic review of olfactory shifts related to obesity*. Obes Rev, 2019. **20**(2): p. 325-338.
4. Kondo, K., et al., *Age-Related Olfactory Dysfunction: Epidemiology, Pathophysiology, and Clinical Management*. Frontiers in Aging Neuroscience, 2020. **12**.
5. Attems, J., L. Walker, and K.A. Jellinger, *Olfaction and Aging: A Mini-Review*. Gerontology, 2015. **61**(6): p. 485-490.
6. Brämerson, A., S. Nordin, and M. Bende, *Clinical experience with patients with olfactory complaints, and their quality of life*. Acta Oto-Laryngologica, 2007. **127**(2): p. 167-174.
7. Doty, R. and V. Kamath, *The influences of age on olfaction: a review*. Frontiers in Psychology, 2014. **5**.
8. Mobley, A.S., et al., *Aging in the olfactory system*. Trends in Neurosciences, 2014. **37**(2): p. 77-84.
9. Schiffman, S.S., *Taste and smell losses in normal aging and disease*. Jama, 1997. **278**(16): p. 1357-62.
10. Gunzer, W., *Changes of Olfactory Performance during the Process of Aging - Psychophysical Testing and Its Relevance in the Fight against Malnutrition*. J Nutr Health Aging, 2017. **21**(9): p. 1010-1015.
11. Papazian, E.J. and J.M. Pinto, *Olfactory loss and aging: connections with health and well-being*. Chem Senses, 2021. **46**.
12. Desiato, V.M., et al., *Evaluating the Relationship Between Olfactory Function and Loneliness in Community-Dwelling Individuals: A Cross-sectional Study*. Am J Rhinol Allergy, 2021. **35**(3): p. 334-340.
13. Sivam, A., et al., *Olfactory Dysfunction in Older Adults is Associated with Feelings of Depression and Loneliness*. Chem Senses, 2016. **41**(4): p. 293-9.
14. Chan, A., et al., *Utility of olfactory identification test for diagnosing Chinese patients with Alzheimer's disease*. J Clin Exp Neuropsychol, 2002. **24**(2): p. 251-9.
15. Suzuki, Y., et al., *Smell identification test as an indicator for cognitive impairment in Alzheimer's disease*. Int J Geriatr Psychiatry, 2004. **19**(8): p. 727-33.
16. Makowska, I., et al., *Olfactory deficits in normal aging and Alzheimer's disease in the polish elderly population*. Arch Clin Neuropsychol, 2011. **26**(3): p. 270-9.
17. Choi, J.S., et al., *Olfactory dysfunction and cognition among older adults in the United States*. Int Forum Allergy Rhinol, 2018. **8**(5): p. 648-654.
18. Palta, P., et al., *Olfactory function and neurocognitive outcomes in old age: The Atherosclerosis Risk in Communities Neurocognitive Study*. Alzheimers Dement, 2018. **14**(8): p. 1015-1021.

19. Gopinath, B., et al., *Olfactory impairment in older adults is associated with depressive symptoms and poorer quality of life scores*. Am J Geriatr Psychiatry, 2011. **19**(9): p. 830-4.
20. Clayton, D.J., et al., *Effect of Breakfast Omission on Energy Intake and Evening Exercise Performance*. Med Sci Sports Exerc, 2015. **47**(12): p. 2645-52.
21. Stroebele, N. and J.M. De Castro, *Effect of ambience on food intake and food choice*. Nutrition, 2004. **20**(9): p. 821-838.
22. Ginieis, R., et al., *The role of an individual's olfactory discriminability in influencing snacking and habitual energy intake*. Appetite, 2021. **167**: p. 105646.
23. Gregori, D., et al., *Understanding the influence of the snack definition on the association between snacking and obesity: a review*. International Journal of Food Sciences and Nutrition, 2011. **62**(3): p. 270-275.
24. Bes-Rastrollo, M., et al., *Prospective study of self-reported usual snacking and weight gain in a Mediterranean cohort: the SUN project*. Clin Nutr, 2010. **29**(3): p. 323-30.
25. Gregori, D., et al., *Understanding the influence of the snack definition on the association between snacking and obesity: a review*. Int J Food Sci Nutr, 2011. **62**(3): p. 270-5.
26. Amara, A.W. and A.A. Memon, *Effects of Exercise on Non-motor Symptoms in Parkinson's Disease*. Clinical Therapeutics, 2018. **40**(1): p. 8-15.
27. Bhalsing, K.S., M.M. Abbas, and L.C.S. Tan, *Role of Physical Activity in Parkinson's Disease*. Ann Indian Acad Neurol, 2018. **21**(4): p. 242-249.
28. Catamo, E., et al., *Differences in taste and smell perception between type 2 diabetes mellitus patients and healthy controls*. Nutrition, Metabolism and Cardiovascular Diseases, 2021. **31**(1): p. 193-200.
29. Erickson, K.I., et al., *Exercise training increases size of hippocampus and improves memory*. Proc Natl Acad Sci U S A, 2011. **108**(7): p. 3017-22.
30. Whiting, P.F., et al., *Evaluation of QUADAS, a tool for the quality assessment of diagnostic accuracy studies*. BMC medical research methodology, 2006. **6**(1): p. 1-8.
31. Bhalla, V., et al., *Randomized trial evaluating effects of exercise on olfaction in patients with early-stage dementia*. The Journal of Laryngology, Rhinology & Otology, 2018. **1**(1): p. The Journal of Laryngology, Rhinology & Otology [2018; 1 (1): 23-32-The Journal of Laryngology, Rhinology & Otology [2018; 1 (1): 23-32.
32. Terashi, H., et al., *Association of daily physical activity with cognition and mood disorders in treatment-naive patients with early-stage Parkinson's disease*. Journal of Neural Transmission, 2019. **126**(12): p. 1617-1624.
33. Stone, H., G. Pryor, and J. Colwell, *OLFACTORY DETECTION THRESHOLDS IN MAN UNDER CONDITIONS OF REST AND EXERCISE*. Perception & Psychophysics, 1967. **2**(4): p. 167-170.
34. Sollai, G. and R. Crnjar, *Age-Related Olfactory Decline Is Associated With Levels of Exercise and Non-exercise Physical Activities*. Frontiers in aging neuroscience, 2021. **13**: p. 695115.

35. Rosenfeldt, A.B., T. Dey, and J.L. Alberts, *Aerobic Exercise Preserves Olfaction Function in Individuals with Parkinson's Disease*. *Parkinson's disease*, 2016(pagination).
36. Marioni, G., et al., *Nasal functional modifications after physical exercise: olfactory threshold and peak nasal inspiratory flow*. *Rhinology*, 2010. **48**(3): p. 277-80.
37. Hoffman, H.J., et al., *New chemosensory component in the U.S. National Health and Nutrition Examination Survey (NHANES): first-year results for measured olfactory dysfunction*. *Reviews in Endocrine & Metabolic Disorders*, 2016. **17**(2): p. 221-40.
38. Havermans, R.C., S.J. Salvy, and A. Jansen, *Single-trial exercise-induced taste and odor aversion learning in humans*. *Appetite*, 2009. **53**(3): p. 442-445.
39. de Jong, N., et al., *Effect of dietary supplements and physical exercise on sensory perception, appetite, dietary intake and body weight in frail elderly subjects*. *British journal of nutrition*, 2000. **83**(6): p. 605-613.
40. Cameron, J.D., et al., *Energy depletion by diet or aerobic exercise alone: impact of energy deficit modality on appetite parameters*. *The American Journal of Clinical Nutrition*, 2016. **103**(4): p. 1008-1016.
41. Zhang, C., D. Li, and X. Wang, *Role of physical exercise type in olfactory deterioration in ageing*. *Rhinology*, 2020. **58**(2): p. 145-150.
42. Tonacci, A., et al., *A Novel Application for Cognitive Evaluation in Mountain Ultramarathons: Olfactory Assessment*. *Wilderness & Environmental Medicine*, 2016. **27**(1): p. 131-5.
43. Falkowski, B., et al., *Association of olfactory function with the intensity of self-reported physical activity in adults with type 1 diabetes*. *Polish Archives Of Internal Medicine*, 2017. **127**(7-8): p. 476-480.
44. Josaphat, K.J., et al., *Impact of Exercise Timing on Chemosensory Response, Appetite, and Energy Intake in Lean Males*. *International Journal of Sport Nutrition & Exercise Metabolism*, 2020: p. 1-8.
45. Schubert, C.R., et al., *Odor detection thresholds in a population of older adults*. *Laryngoscope*, 2017. **127**(6): p. 1257-1262.
46. Gallo, S., et al., *Associations of olfactory dysfunction with anthropometric and cardiometabolic measures: Findings from the 2013-2014 national health and nutrition examination survey (NHANES)*. *Physiology & Behavior*, 2020. **215**: p. 112702.
47. Schubert, C.R., et al., *Association of exercise with lower long-term risk of olfactory impairment in older adults*. *JAMA Otolaryngology-- Head & Neck Surgery*, 2013. **139**(10): p. 1061-6.
48. Ainsworth, B.E., et al., *2011 Compendium of Physical Activities: a second update of codes and MET values*. *Med Sci Sports Exerc*, 2011. **43**(8): p. 1575-1581.
49. Deighton, K. and D.J. Stensel, *Creating an acute energy deficit without stimulating compensatory increases in appetite: is there an optimal exercise protocol?* *Proceedings of the Nutrition Society*, 2014. **73**(2): p. 352-358.

50. Hazell, T.J., et al., *Effects of exercise intensity on plasma concentrations of appetite-regulating hormones: Potential mechanisms*. *Appetite*, 2016. **98**: p. 80-88.
51. Fadool, D.A. and L.J. Kolling, *Role of Olfaction for Eating Behavior*, in *The Senses: A Comprehensive Reference (Second Edition)*, B. Fritzsche, Editor. 2020, Elsevier: Oxford. p. 675-716.
52. Swift, D.L., et al., *The Effects of Exercise and Physical Activity on Weight Loss and Maintenance*. *Progress in Cardiovascular Diseases*, 2018. **61**(2): p. 206-213.
53. Irwin, M.L., et al., *Relationship of obesity and physical activity with C-peptide, leptin, and insulin-like growth factors in breast cancer survivors*. *Cancer Epidemiol Biomarkers Prev*, 2005. **14**(12): p. 2881-8.
54. Tschöp, M., et al., *Circulating ghrelin levels are decreased in human obesity*. *Diabetes*, 2001. **50**(4): p. 707-9.
55. Roupas, N.D., et al., *The effect of prolonged aerobic exercise on serum adipokine levels during an ultra-marathon endurance race*. *Hormones*, 2013. **12**(2): p. 275-282.
56. Serby, M., *Olfaction and Alzheimer's disease*. *Progress in Neuro-Psychopharmacology and Biological Psychiatry*, 1986. **10**(3-5): p. 579-586.
57. Doty, R.L. and C.H. Hawkes, *Chemosensory dysfunction in neurodegenerative diseases*. *Handb Clin Neurol*, 2019. **164**: p. 325-360.
58. Brodoehl, S., et al., *Decreased olfactory bulb volume in idiopathic Parkinson's disease detected by 3.0-tesla magnetic resonance imaging*. *Mov Disord*, 2012. **27**(8): p. 1019-25.
59. Wang, J., et al., *Association of olfactory bulb volume and olfactory sulcus depth with olfactory function in patients with Parkinson disease*. *AJNR Am J Neuroradiol*, 2011. **32**(4): p. 677-81.
60. Yousem, D.M., et al., *Olfactory bulb and tract and temporal lobe volumes. Normative data across decades*. *Ann N Y Acad Sci*, 1998. **855**: p. 546-55.
61. Pearce, R.K., C.H. Hawkes, and S.E. Daniel, *The anterior olfactory nucleus in Parkinson's disease*. *Mov Disord*, 1995. **10**(3): p. 283-7.
62. Thomann, P.A., et al., *MRI-derived atrophy of the olfactory bulb and tract in mild cognitive impairment and Alzheimer's disease*. *J Alzheimers Dis*, 2009. **17**(1): p. 213-21.
63. Brown, J., et al., *Enriched environment and physical activity stimulate hippocampal but not olfactory bulb neurogenesis*. *Eur J Neurosci*, 2003. **17**(10): p. 2042-6.
64. Sorokowska, A., et al., *Food-Related Odors Activate Dopaminergic Brain Areas*. *Front Hum Neurosci*, 2017. **11**: p. 625.
65. Malik, S., et al., *Ghrelin modulates brain activity in areas that control appetitive behavior*. *Cell Metab*, 2008. **7**(5): p. 400-9.
66. Al Massadi, O., et al., *Ghrelin and food reward*. *Neuropharmacology*, 2019. **148**: p. 131-138.
67. Ouerghi, N., et al., *Ghrelin Response to Acute and Chronic Exercise: Insights and Implications from a Systematic Review of the Literature*. *Sports Med*, 2021. **51**(11): p. 2389-2410.

68. Cummings, D.E., et al., *A Preprandial Rise in Plasma Ghrelin Levels Suggests a Role in Meal Initiation in Humans*. *Diabetes*, 2001. **50**(8): p. 1714-1719.
69. Ulusoy, S., et al., *Are people who have a better smell sense, more affected from satiation?* *Braz J Otorhinolaryngol*, 2017. **83**(6): p. 640-645.
70. Gudziol, H. and O. Guntinas-Lichius, *Electrophysiologic assessment of olfactory and gustatory function*. *Handb Clin Neurol*, 2019. **164**: p. 247-262.
71. Whitcroft, K.L., et al., *Short inter-stimulus intervals can be used for olfactory electroencephalography in patients of varying olfactory function*. *Neuroscience*, 2017. **363**: p. 26-33.
72. Yarnitsky, D., et al., *Multiple session experimental pain measurement*. *Pain*, 1996. **67**(2-3): p. 327-33.
73. Cerin, E., et al., *Correlates of Agreement between Accelerometry and Self-reported Physical Activity*. *Med Sci Sports Exerc*, 2016. **48**(6): p. 1075-84.
